# Supplementary material for: Paramagnetic electron centers in BaTiO3 nanoparticle powders
Source: Royal Society of Chemistry journal article supplement (doi:10.1039/d1cp01128f), 2021-01-01
Supplement: d1cp01128f1.pdf [file d1cp01128f1.pdf]

Supplementary Information

# Paramagnetic Electron Centers in BaTiO<sub>3</sub> Nanoparticle Powders

*Ellie Neige, Oliver Diwald*

Department of Chemistry and Physics of Materials,  
Paris Lodron Universität Salzburg,

Jakob-Haringer Strasse 2a, A-5020 Salzburg (Austria) E-mail:  
oliver.diwald@sbg.ac.at

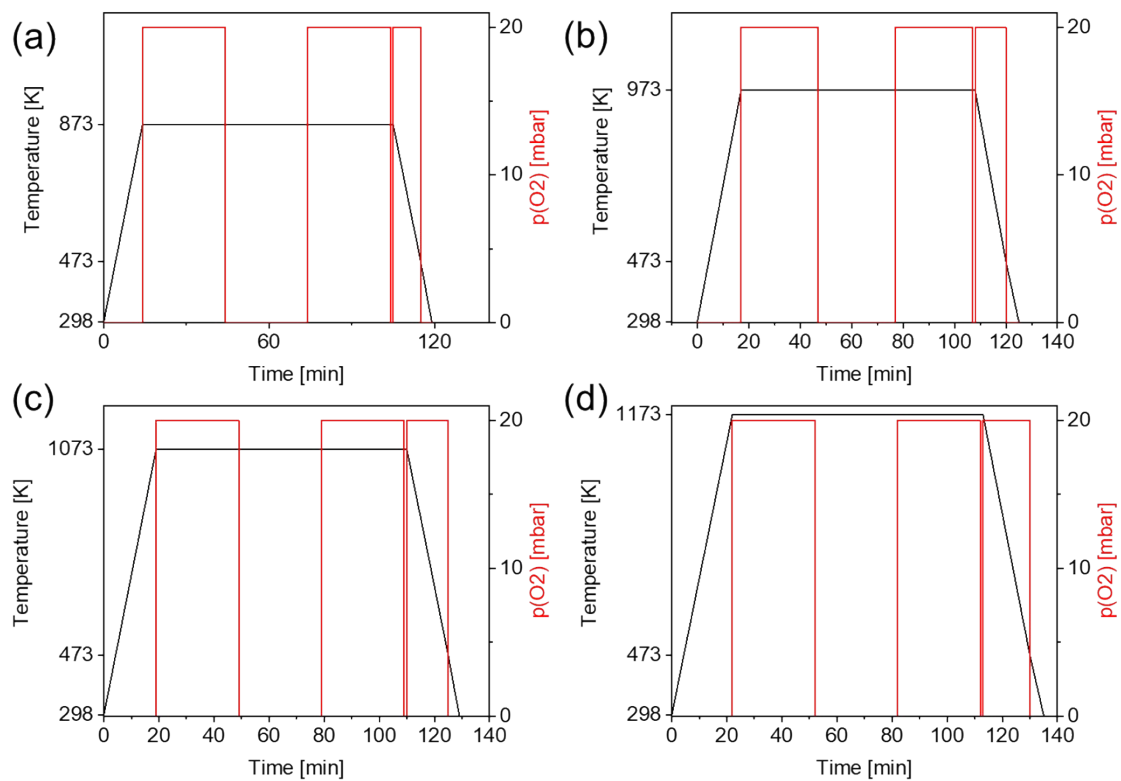

Figure S1. Temperature – pressure profiles for the BTO particle powder pre-annealing steps in the temperature range between  $T = 873$  K (a) to  $T = 1173$  K (d).

S2

87  
3 K

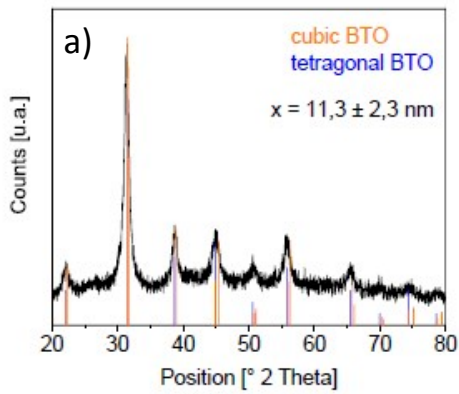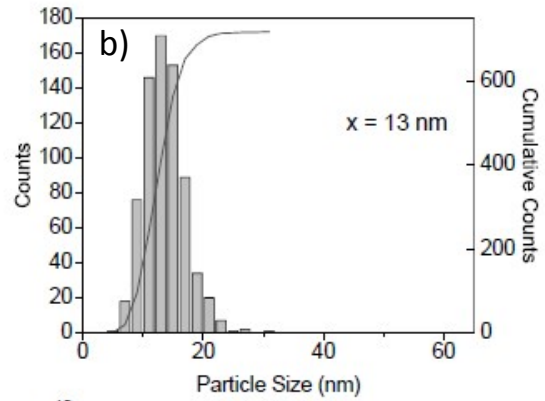

97  
3 K

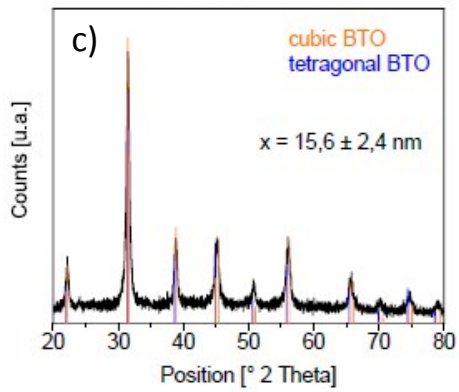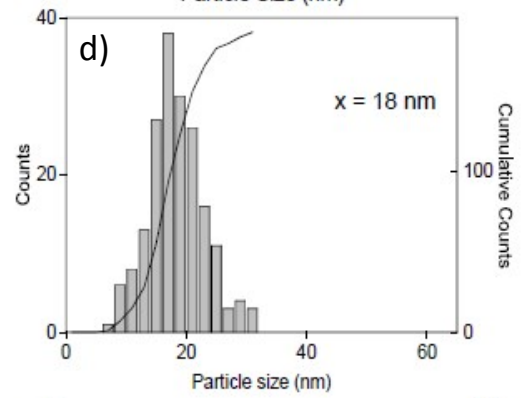

10  
73  
..

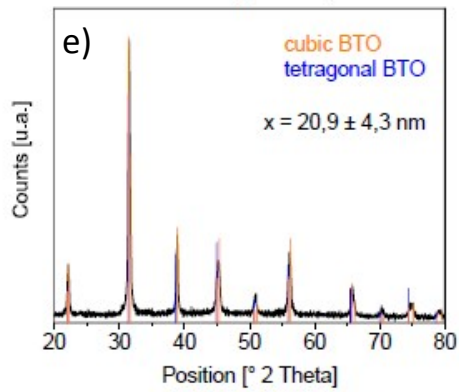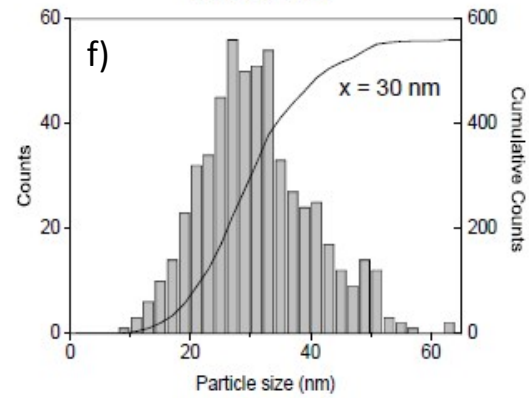

11  
73  
..

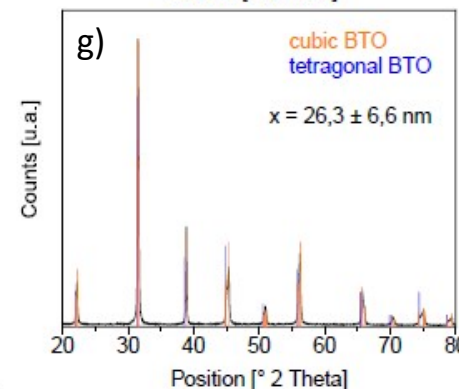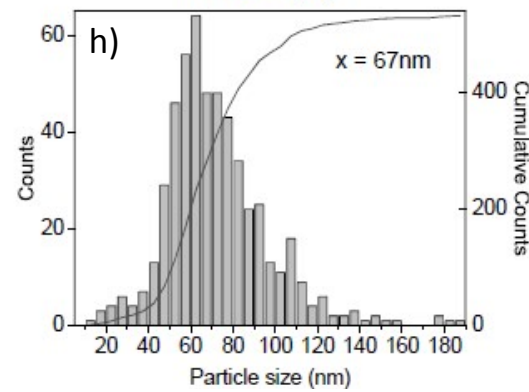

Figure S2. XRD powder patterns (a, c, e and g) and particle size distribution plots (b, d, f and h) of BaTiO<sub>3</sub> nanoparticle powders pre-annealed at the temperatures between T = 873 K and 1173 K.

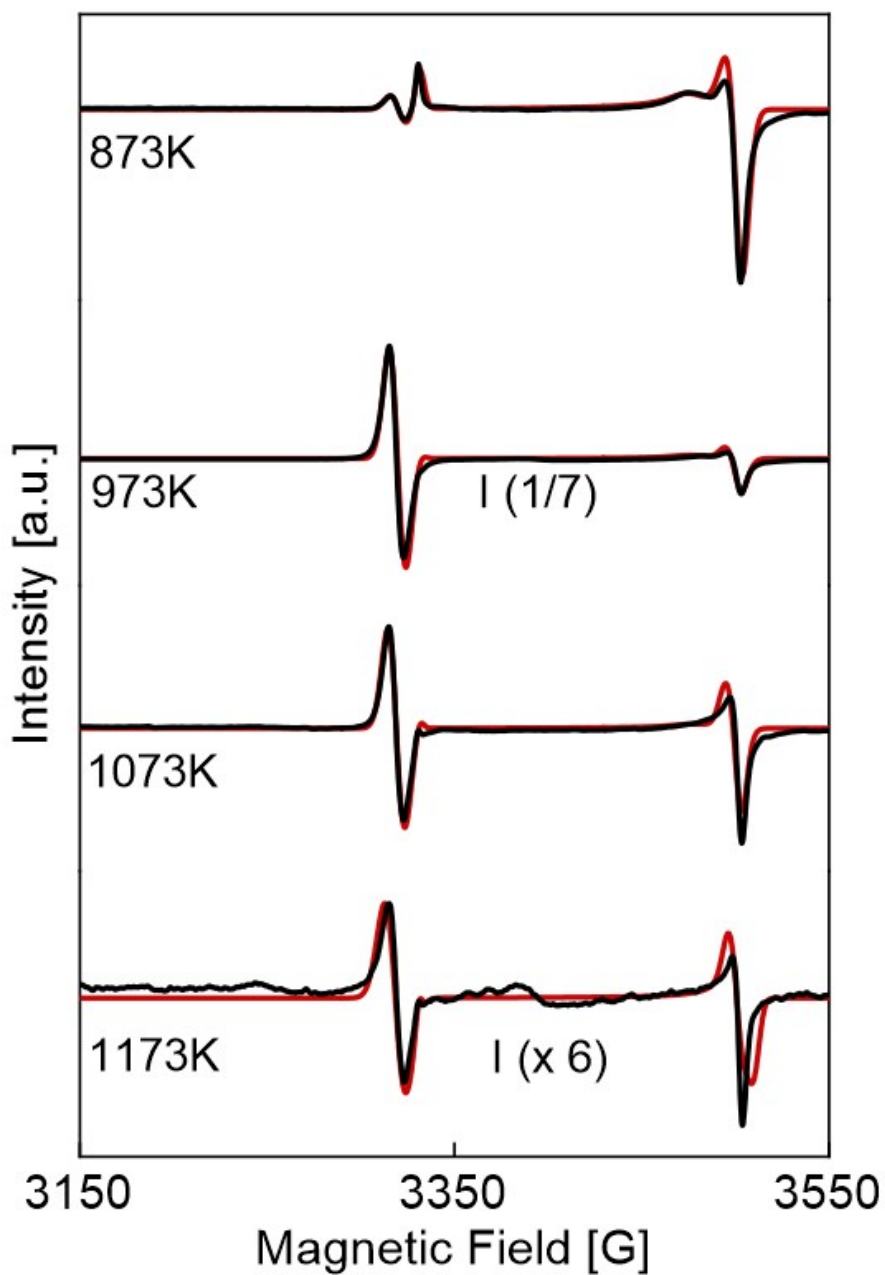

*Figure S3.* Experimental (black line) and simulated (red line) EPR spectra of BaTiO<sub>3</sub> nanoparticles after thermal pre-treatment in the temperature range of  $T = 873$  K to 1173 K.

**Table S1: Spin Hamiltonian of the EPR signals plotted in Figure 2(d-f) and Figure 3.**

| BTO 873K                                          |             |                               |          |            |                                |         | BTO 1073K                                         |             |                            |          |           |                                |        |
|---------------------------------------------------|-------------|-------------------------------|----------|------------|--------------------------------|---------|---------------------------------------------------|-------------|----------------------------|----------|-----------|--------------------------------|--------|
|                                                   | Spin System | g-values                      | g-strain | H-strain   | lwpp (line width peak to peak) | weight  |                                                   | Spin System | g-values                   | g-strain | H-strain  | lwpp (line width peak to peak) | weight |
| Ti <sup>3+</sup> c-type axial symmetry            | 1/2         | 1.89973<br>1.9968             |          | [22 10 0]  | [0.47043]                      | 17.0012 | Ti <sup>3+</sup> c-type axial symmetry            | 1/2         | 1.89973<br>1.9968          |          | [22 10 0] | [0.4]                          | 5      |
| Ti <sup>3+</sup> c-type orthorombic symmetry      | 1/2         | 1.89951<br>1.91078<br>1.99745 |          | [5 50 0]   | [0.478379]                     | 13.0003 | Ti <sup>3+</sup> c-type orthorombic symmetry      | 1/2         | 1.8985<br>1.9099<br>1.9968 |          | [5 50 0]  | [0.4]                          | 3      |
| Paramagnetic barium-oxygen divacancy              | 1/2         | 2.0039                        | [0.0063] |            | [0]                            | 0.38    | Paramagnetic barium-oxygen divacancy              | 1/2         | 2.0042                     | [0.0064] |           | [0]                            | 3      |
| Ti <sup>3+</sup> / electron center axial symmetry | 1/2         | 1.9010<br>1.9060              |          | [0 0 0.5]  | [0.6]                          | 0.30    | Ti <sup>3+</sup> / electron center axial symmetry | 1/2         | 1.8999<br>1.9040           |          | [0 0 0.5] | [0.6]                          | 0.8    |
| BTO 973K                                          |             |                               |          |            |                                |         | BTO 1173K                                         |             |                            |          |           |                                |        |
|                                                   | Spin System | g-values                      | g-strain | H-strain   | lwpp (line width peak to peak) | weight  |                                                   | Spin System | g-values                   | g-strain | H-strain  | lwpp (line width peak to peak) | weight |
| Ti <sup>3+</sup> c-type axial symmetry            | 1/2         | 1.89973<br>1.9968             |          | [22 10 10] | [0.47043]                      | 17.0012 | Ti <sup>3+</sup> c-type axial symmetry            | 1/2         | 1.9032<br>2.0014           |          | [22 10 0] | [0.32]                         | 1.8    |
| Ti <sup>3+</sup> c-type orthorombic symmetry      | 1/2         | 1.899<br>1.9097<br>1.9968     |          | [5 50 0]   | [0.5]                          | 20      | Ti <sup>3+</sup> c-type orthorombic symmetry      |             |                            |          |           |                                |        |
| Paramagnetic barium-oxygen divacancy              | 1/2         | 2.0039                        | [0.0063] |            | [0]                            | 21      | Paramagnetic barium-oxygen divacancy              | 1/2         | 2.009                      | [0.008]  |           | [0]                            | 0.63   |
| Ti <sup>3+</sup> / electron center axial symmetry | 1/2         | 1.9005<br>1.9040              |          | [0 0 0.5]  | [0.6]                          | 0.8     | Ti <sup>3+</sup> / electron center axial symmetry | 1/2         | 1.8999<br>1.9070           |          | [0 0 0.5] | [0.6]                          | 0.20   |
